# Supplementary material for: On the Characterization of Intermediates in the Isodesmic Aggregation Pathway of Hen Lysozyme at Alkaline pH
Source: PubMed Central journal article supplement (PMC3904990; doi:10.1371/journal.pone.0087256), 2014-01-28
Supplement: pone.0087256.s006.pdf [file pone.0087256.s006.pdf]

### ANS emission maxima after transfer from 120 $\mu\text{M}$ HEWL

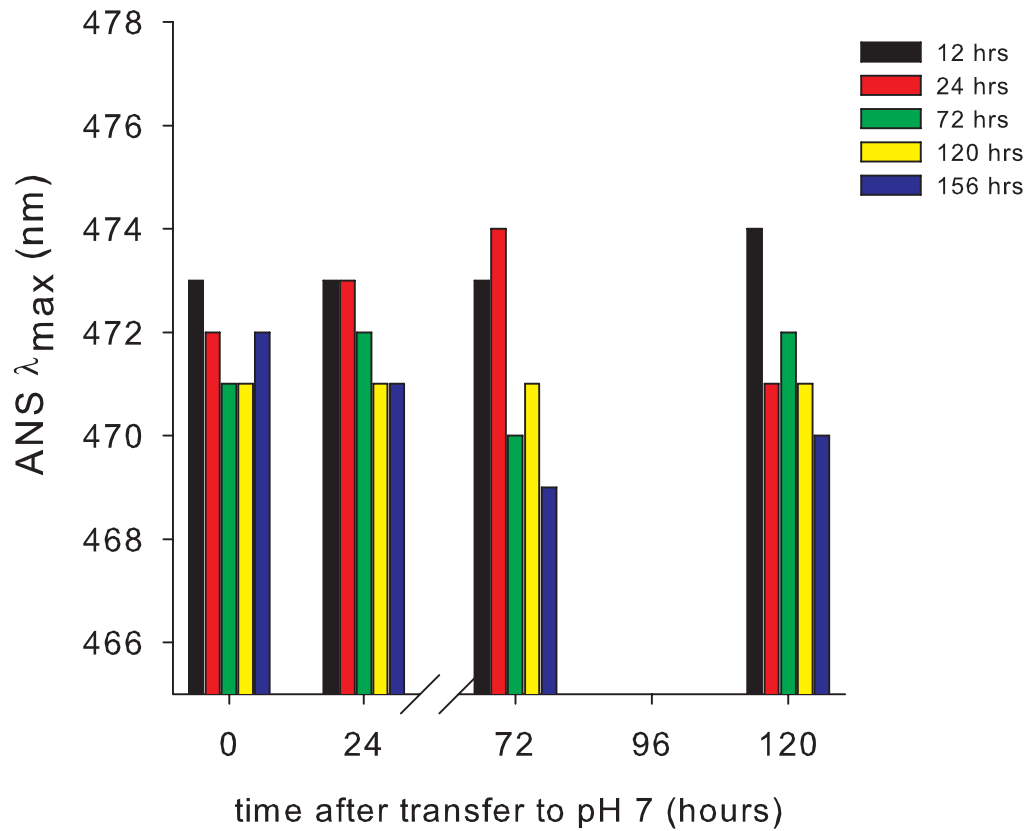

### ANS emission maxima after transfer from 40 $\mu\text{M}$ HEWL

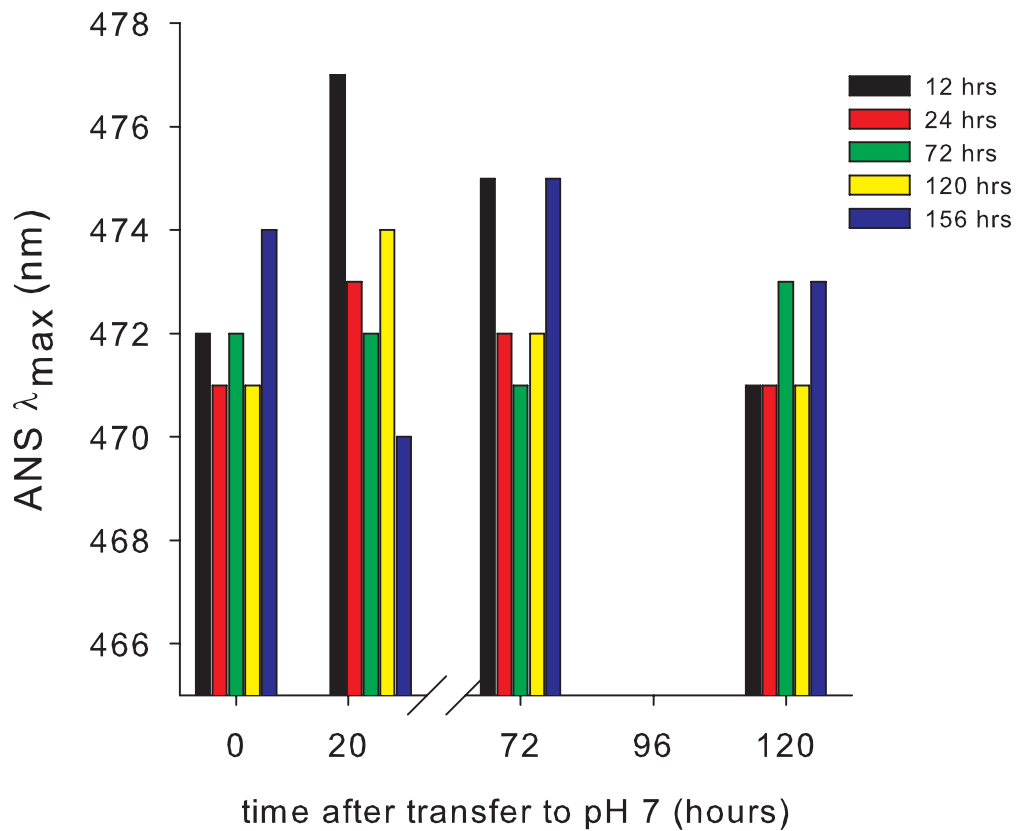

**Figure S6:** Emission maxima of ANS in presence of HEWL nanoparticles transferred to pH 7. The variation in emission maxima of ANS in presence of HEWL nanoparticles with time after 10-fold dilution to pH 7 from 120 (Fig. 4c) or 40 (Fig. 4d)  $\mu\text{M}$  samples.
