# Supplementary material for: On the Characterization of Intermediates in the Isodesmic Aggregation Pathway of Hen Lysozyme at Alkaline pH
Source: PubMed Central journal article supplement (PMC3904990; doi:10.1371/journal.pone.0087256), 2014-01-28
Supplement: pone.0087256.s007.pdf [file pone.0087256.s007.pdf]

**Table S1:** Parameters extracted (using eq. 5) from tail fit analysis of fluorescence anisotropy decays shown in Figure 2c. (Note:  $\chi^2$  reported here is reduced chisquare)

| Figure | [HEWL], pH           | Time of incubation (hours) | A     | $\phi_1$ (ns) | $\phi_2$ (ns) | $\beta_1$ | $\beta_2$ | $\chi^2$ |
|--------|----------------------|----------------------------|-------|---------------|---------------|-----------|-----------|----------|
| 2c A   | 3 $\mu$ M, pH 7.0    | 24                         | 0.000 | 0.14          | <b>4.3</b>    | 0.08      | 0.92      | 1.1      |
| 2c B   | 0.3 $\mu$ M, pH 12.2 | 24                         | 0.00  | 0.12          | <b>5.3</b>    | 0.09      | 0.91      | 1.01     |
| 2c C   | 3 $\mu$ M, pH 12.2   | 24                         | 0.004 | 0.24          | <b>9.8</b>    | 0.03      | 0.97      | 1.02     |
| 2c D   | 20 $\mu$ M, pH 12.2  | 24                         | 0.002 | 0.54          | <b>15</b>     | 0.02      | 0.98      | 1.03     |
| 2c E   | 120 $\mu$ M, pH 12.2 | 24                         | 0.002 | 0.76          | <b>26</b>     | 0.01      | 0.99      | 0.99     |
