# Supplementary material for: On the Characterization of Intermediates in the Isodesmic Aggregation Pathway of Hen Lysozyme at Alkaline pH
Source: PubMed Central journal article supplement (PMC3904990; doi:10.1371/journal.pone.0087256), 2014-01-28
Supplement: pone.0087256.s008.pdf [file pone.0087256.s008.pdf]

**Table S2:** Observed average  $\pm$  std. dev. of global rotational correlation time ( $\phi_2$ ) extracted from multiple experiments after 12 and 24 hrs of aggregation displayed in Figure 2d.

| [HEWL], pH           | Time of incubation (hours) | $\phi_2$ (ns)  |
|----------------------|----------------------------|----------------|
| 3 $\mu$ M, pH 7.0    | 12                         | 4.5 $\pm$ 0.01 |
| 0.3 $\mu$ M, pH 12.2 | 12                         | 7.9 $\pm$ 0.8  |
| 3 $\mu$ M, pH 12.2   | 12                         | 10.6 $\pm$ 0.4 |
| 20 $\mu$ M, pH 12.2  | 12                         | 14.5 $\pm$ 2.4 |
| 120 $\mu$ M, pH 12.2 | 12                         | 26.9 $\pm$ 2.3 |
| 3 $\mu$ M, pH 7.0    | 24                         | 4.4 $\pm$ 0.04 |
| 0.3 $\mu$ M, pH 12.2 | 24                         | 6.9 $\pm$ 2.2  |
| 3 $\mu$ M, pH 12.2   | 24                         | 9.7 $\pm$ 0.2  |
| 20 $\mu$ M, pH 12.2  | 24                         | 14.7 $\pm$ 0.3 |
| 120 $\mu$ M, pH 12.2 | 24                         | 25.8 $\pm$ 0.8 |
